# Supplementary material
Source: PubMed Central journal article supplement (PMC10687834)
Supplement: NIHMS1884934-supplement-1.pdf [file NIHMS1884934-supplement-1.pdf]

# Supplementary Material

## A Conceptual Model to Improve Care for Individuals with Alzheimer’s Disease and Related Dementias and Their Caregivers: Qualitative Findings in an Online Caregiver Forum

**Supplementary Table 1. Frequencies of themes, sub-themes, and codes.**

| Themes, Sub-themes and Codes                                     | Code Frequency |
|------------------------------------------------------------------|----------------|
| <b>1. Individual with ADRD</b>                                   |                |
| <i>1a. ADRD effect on individual with ADRD</i>                   |                |
| Capabilities and functioning                                     | 114            |
| Stage and/or diagnosis of ADRD                                   | 65             |
| <i>1b. Health and medications of individual with ADRD</i>        |                |
| Pharmacotherapy                                                  | 49             |
| Confounding illness                                              | 40             |
| Hospitalization                                                  | 11             |
| <b>2. Caregiver</b>                                              |                |
| <i>2a. Handling of the caregiving role and support within it</i> |                |
| Information support                                              | 196            |
| Emotional support                                                | 182            |
| Emotions associated with caregiving                              | 74             |
| Spirituality/Religion                                            | 52             |
| Emotions associated with loss                                    | 40             |
| Self-care                                                        | 34             |
| Presence of offline social support                               | 12             |
| Coping techniques                                                | 11             |
| <i>2b. Effects of caregiving on the caregiver</i>                |                |
| Caregiver burden                                                 | 73             |
| Caregiver: physical and mental health                            | 34             |
| Life balance                                                     | 22             |
| Effects of caregiving on family                                  | 17             |
| <b>3. Dynamic Between Caregiver and Individual with ADRD</b>     |                |
| <i>3a. Caregiver decisions impacting individual with ADRD</i>    |                |
| Medical decisions                                                | 70             |
| Moral dilemma                                                    | 59             |
| Facility placement                                               | 36             |
| Supplemental products/therapies                                  | 6              |
| <i>3b. Caregiving role and individual with ADRD</i>              |                |
| Caregiving strategies                                            | 75             |
| Ensuring comfort                                                 | 67             |
| Caregiver reflection of LO past                                  | 24             |
| Unrealistic expectations                                         | 9              |
| Consequences of unmonitored ADRD                                 | 2              |

|                                                                                         |    |
|-----------------------------------------------------------------------------------------|----|
| <b><i>3c. Behavioral and psychological symptoms of ADRD affecting the caregiver</i></b> |    |
| Challenging behavior                                                                    | 72 |
| Mental health                                                                           | 72 |
| Progression speed/realization                                                           | 52 |
| Anosognosia and/or compliance issues                                                    | 46 |
| Eating behavior                                                                         | 31 |
| LO dependency                                                                           | 4  |
| False hope                                                                              | 2  |
| <b><i>3d. Relationship between the caregiver and individual with ADRD</i></b>           |    |
| Relationship between caregiver and care recipient                                       | 38 |
| Finding purpose in caregiving                                                           | 9  |
| <b>4. Context of Care</b>                                                               |    |
| <b><i>4a. Managerial aspects of care</i></b>                                            |    |
| Logistics of care                                                                       | 67 |
| Finances                                                                                | 66 |
| Legal matters                                                                           | 41 |
| <b><i>4b. Care and caregiving arrangements</i></b>                                      |    |
| Supplemental care/services in caregiving role                                           | 60 |
| Living arrangement/relocation                                                           | 44 |
| Remote caregiving                                                                       | 22 |
| Last resort alternative                                                                 | 2  |
| Family involvement                                                                      | 68 |
| End of life care/stage                                                                  | 47 |
| <b><i>4c. Physical environment and activities</i></b>                                   |    |
| Environment and safety                                                                  | 39 |
| Activities and stimulation                                                              | 28 |
| Visiting and/or routine                                                                 | 22 |
| <b><i>4d. Healthcare context</i></b>                                                    |    |
| Quality of healthcare                                                                   | 33 |
| Problems with healthcare system                                                         | 3  |
